# Supplementary material for: Mechanisms of temperature-dependent oxygen absorption/release and appearance of intermediate phase in κ-Ce2Zr2O8: study based on oxygen vacancy formation energy computations
Source: Royal Society of Chemistry journal article supplement (doi:10.1039/d2ra02419e), 2022-01-01
Supplement: d2ra02419e1.pdf [file d2ra02419e1.pdf]

# Supporting Information for “Mechanisms of temperature-dependent oxygen absorption/release and appearance of intermediate phase in $\kappa$ -Ce<sub>2</sub>Zr<sub>2</sub>O<sub>8</sub>: study based on oxygen vacancy formation energy computations”

Hirotoishi Hirai\* and Ryosuke Jinnouchi

*Toyota Central Research and Development Labs., Inc.,*

*41-1, Yokomichi, Nagakute, Aichi 480-1192, Japan*

Figure S1 shows the total energies of the Ce<sub>16</sub>Ti<sub>2</sub>Zr<sub>14</sub>O<sub>64</sub> systems for the symmetrically independent combinations of Ti substitutions. This figure indicates that the two substituted Ti atoms are adjacent to each other in the most stable state.

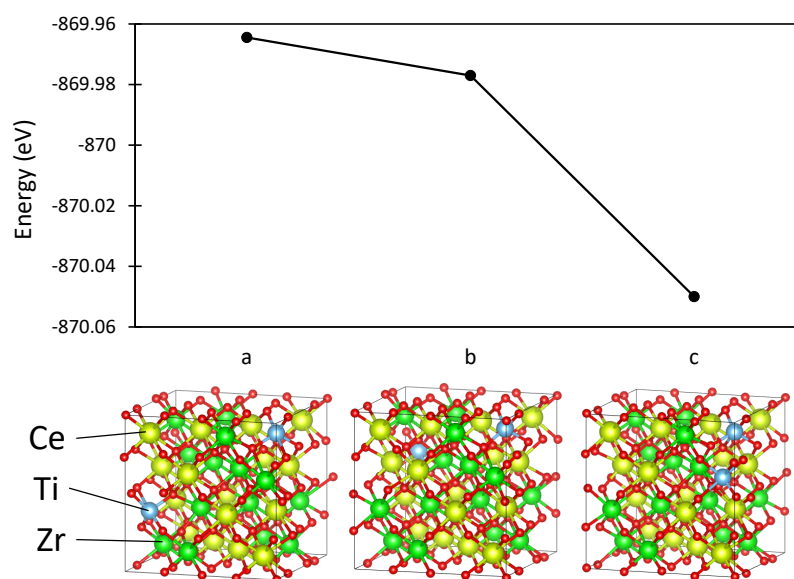

Figure S1: The total energies of the Ce<sub>16</sub>Ti<sub>2</sub>Zr<sub>14</sub>O<sub>64</sub> systems for the symmetrically independent combinations of Ti substitutions.

\* hirotoasih@mosk.tytlabs.co.jp
